# Supplementary material
Source: publisher figshare collection journal article supplement (https://springernature.figshare.com/ndownloader/files/21687630)
Supplement: Supplementary file 1 [file 21687630]

## Sheet: Sheet1
Table S4. List of 47 genomes surveyed in this study
Group	Species	Rescource
Animals	Strongyloides ratti	Ensembl Genomes
Animals	Branchiostoma lanceolatum	Ensembl Genomes
Animals	Leptotrombidium deliense	Ensembl Genomes
Animals	Pediculus humanus	Ensembl Genomes
Animals	Apis mellifera	Ensembl Genomes
Animals	Daphnia pulex	Ensembl Genomes
Animals	Schistosoma mansoni	Ensembl Genomes
Fungi	Rhizophagus irregularis	Ensembl Genomes
Fungi	Botryobasidium botryosum	Ensembl Genomes
Fungi	Diplodia seriata	Ensembl Genomes
Fungi	Aureobasidium melanogenum	Ensembl Genomes
Fungi	Blumeria graminis	Ensembl Genomes
Fungi	Glarea lozoyensis	Joint Genome Institute
Fungi	Sclerotinia sclerotiorum	Ensembl Genomes
Fungi	Fonsecaea erecta	Ensembl Genomes
Fungi	Cladophialophora bantiana	Ensembl Genomes
Fungi	Byssochlamys spectabilis	Joint Genome Institute
Fungi	Penicillium expansum	Ensembl Genomes
Fungi	Ascosphaera apis	Ensembl Genomes
Fungi	Valsa mali	Ensembl Genomes
Fungi	Ceratocystis platani	Ensembl Genomes
Fungi	Colletotrichum higginsianum	Ensembl Genomes
Fungi	Acremonium chrysogenum	Ensembl Genomes
Green plants	Musa acuminata	Ensembl Genomes
Green plants	Brachypodium distachyon	Ensembl Genomes
Green plants	Zea mays	Ensembl Genomes
Green plants	Triticum aestivum	Ensembl Genomes
Green plants	Sorghum bicolor	Phytozome
Green plants	Oryza nivara	Ensembl Genomes
Green plants	Solanum tuberosum	Phytozome
Green plants	Solanum lycopersicum	Phytozome
Green plants	Daucus carota	Phytozome
Green plants	Medicago truncatula	Phytozome
Green plants	Glycine max	Phytozome
Green plants	Brassica rapa	Phytozome
Green plants	Arabidopsis thaliana	The Arabidopsis Information Resource
Green plants	Ricinus communis	Phytozome
Green plants	Manihot esculenta	Phytozome
Green plants	Populus trichocarpa	Phytozome
Green plants	Cucumis sativus	Phytozome
Green plants	Theobroma cacao	Phytozome
Green plants	Amborella trichopoda	Phytozome
Green plants	Physcomitrella patens	Phytozome
Green plants	Ostreococcus sp.lucimarinus	Phytozome
Green plants	Ostreococcus tauri	Joint Genome Institute
Green plants	Volvox carteri	Phytozome
Green plants	Chlamydomonas reinhardtii	Phytozome
